# Supplementary material for: Association between Coalmine Dust and Mortality Risk of Lung Cancer: A Meta-Analysis
Source: PubMed Central journal article supplement (PMC7963907; doi:10.1155/2021/6624799), 2021-03-08
Supplement: 6624799.f1.pdf [file 6624799.f1.pdf]

**Association between coalmine dust and mortality risk of lung cancer:  
a meta analysis**

Linlin Li <sup>1,2</sup>, Min Jiang <sup>3</sup>, Xuelian Li <sup>3</sup> and Baosen Zhou <sup>1\*</sup>

<sup>1</sup> Department of Clinical Epidemiology, First Affiliated Hospital, China Medical University, Shenyang 110001, China.

<sup>2</sup> Medical Oncology Department of Thoracic Cancer (2), Cancer Hospital of China Medical University, Liaoning Cancer Hospital & Institute, No.44, Xiaoheyuan Road, Dadong District, Shenyang 110042, Liaoning Province, People's Republic of China

<sup>3</sup> Department of Epidemiology, School of Public Health, China Medical University, Shenyang 110122, China.

13504982940@163.com (L.L.); mij9620@163.com (M.J.); xlli@cmu.edu.cn (X.L.);  
bszhou@cmu.edu.cn (B.Z.).

\* Corresponding Author: Baosen Zhou

Address: No.155 Nanjing Bei Street, Shenyang, Liaoning 110001, People's Republic of China.

Tel.: +86-13386881563; E-mail Address: bszhou@cmu.edu.cn

Table S1 Assessment of study quality and risk of bias for cross-sectional study

| Researcher                                     | Definition of the source of information (1) | List inclusion and exclusion criteria exposed and unexposed subjects (1) | Indicate whether period used for identifying patients (1) | Indicate whether or not subjects were consented (1) | Explain any patient exclusions from analysis (1) | Indicate if evaluators of subjective component of study were masked to other aspects of the status of participants (1) | Describe if any assessments undertaken for quality assurance of the purpose (1) | Describe how confidence was assessed and/or controlled (1) | Explain how missing data were handled in the analysis (1) | Summarize patient response rates and completeness of data collection (1) | Clarify what follow-up and percentage of patients for which incomplete data or follow-up was obtained (1) | Total score |
|------------------------------------------------|---------------------------------------------|--------------------------------------------------------------------------|-----------------------------------------------------------|-----------------------------------------------------|--------------------------------------------------|------------------------------------------------------------------------------------------------------------------------|---------------------------------------------------------------------------------|------------------------------------------------------------|-----------------------------------------------------------|--------------------------------------------------------------------------|-----------------------------------------------------------------------------------------------------------|-------------|
| Coggon D 1995                                  | 1                                           | 1                                                                        | 1                                                         | 1                                                   | 1                                                | 1                                                                                                                      | 0                                                                               | 0                                                          | 0                                                         | 0                                                                        | 0                                                                                                         | 6           |
| Enteliner PE 1964                              | 1                                           | 1                                                                        | 1                                                         | 1                                                   | 1                                                | 1                                                                                                                      | 0                                                                               | 0                                                          | 0                                                         | 0                                                                        | 0                                                                                                         | 6           |
| Hrubec Z 1995                                  | 1                                           | 1                                                                        | 1                                                         | 1                                                   | 1                                                | 1                                                                                                                      | 0                                                                               | 1                                                          | 0                                                         | 0                                                                        | 0                                                                                                         | 7           |
| Office of Population Censuses and Surveys 1978 | 1                                           | 1                                                                        | 1                                                         | 1                                                   | 1                                                | 1                                                                                                                      | 0                                                                               | 0                                                          | 0                                                         | 0                                                                        | 0                                                                                                         | 6           |

Table S2 Assessment of study quality and risk of bias for case control study

| Research       | Is the case definition adequate | Representativeness of the cases | Selection of Controls | Definition of Controls | Comparability of cases and controls on the basis of the design or analysis | Ascertainment of exposure | Same method of ascertainment for cases and controls | Non-Response rate | Total scores (9) |
|----------------|---------------------------------|---------------------------------|-----------------------|------------------------|----------------------------------------------------------------------------|---------------------------|-----------------------------------------------------|-------------------|------------------|
| Wang ZG 1992   | 1                               | 1                               | 1                     | 1                      | 2                                                                          | 1                         | 1                                                   | 0                 | 8                |
| Ameis RG 1983  | 1                               | 1                               | 1                     | 1                      | 2                                                                          | 0                         | 1                                                   | 1                 | 8                |
| Swain GMH 1995 | 0                               | 0                               | 1                     | 1                      | 2                                                                          | 1                         | 1                                                   | 1                 | 7                |

Table S3 Assessment of study quality and risk of bias for cohort study

| Research      | Representativeness of the exposed cohort (1) | Selection of the non-exposed cohort (1) | Ascertainment of exposure (1) | Demonstration that outcome of interest was not present at start of study (1) | Comparability of cohorts on the basis of the design or analysis (2) | Assessment of outcome (1) | Was follow-up long enough for outcomes to occur (1) | Adequacy of follow-up (1) | Total scores (9) |
|---------------|----------------------------------------------|-----------------------------------------|-------------------------------|------------------------------------------------------------------------------|---------------------------------------------------------------------|---------------------------|-----------------------------------------------------|---------------------------|------------------|
| Rockette 1977 | 1                                            | 1                                       | 1                             | 1                                                                            | 2                                                                   | 1                         | 1                                                   | 1                         | 9                |
| Wang JW 1988  | 1                                            | 1                                       | 1                             | 1                                                                            | 2                                                                   | 1                         | 1                                                   | 1                         | 9                |
| Guo P 1994    | 1                                            | 1                                       | 1                             | 1                                                                            | 2                                                                   | 1                         | 0                                                   | 1                         | 8                |
| Kuempel       | 1                                            | 1                                       | 1                             | 1                                                                            | 2                                                                   | 1                         | 1                                                   | 1                         | 9                |
